# Supplementary material for: Solution treatment controls charge-transfer states and energy-level alignment at hybrid CuSCN-organic interfaces
Source: Royal Society of Chemistry journal article supplement (doi:10.1039/d3lf00244f), 2024-01-01
Supplement: d3lf00244f1.pdf [file d3lf00244f1.pdf]

## Supporting information

to:

### **Solution-treatment controls charge-transfer states and energy-level alignment at hybrid CuSCN-organic interfaces**

Yingying Li<sup>1,2</sup>, Zhewei Chen<sup>1,2</sup>, Wenjie Zhou<sup>1,2</sup>, Qi Wang<sup>1,2</sup>, Yuan Zhang<sup>1,2</sup>,  
Tao Song<sup>1,2,\*</sup>, Baoquan Sun<sup>1,2,\*</sup> and Steffen Duhm<sup>1,2,\*</sup>

<sup>1</sup>*Institute of Functional Nano & Soft Materials (FUNSOM), Soochow University, Suzhou  
215123, People's Republic of China*

<sup>2</sup>*Jiangsu Key Laboratory of Advanced Negative Carbon Technologies, Soochow  
University, Suzhou 215123, People's Republic of China*

*\*tsong@suda.edu.cn, bqsun@suda.edu.cn, duhm@suda.edu.cn*

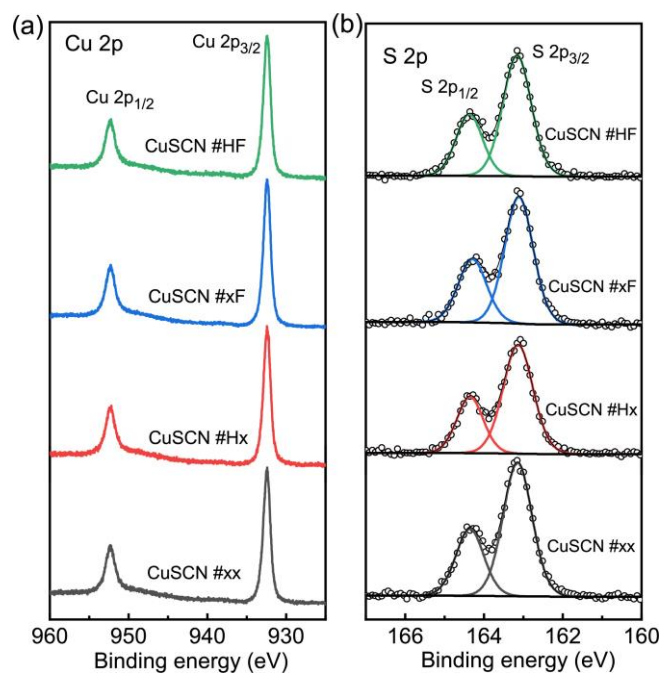

**Figure S1.** XPS measured Cu 2p (a) and S 2p (b) spectra of CuSCN thin films on ITO.

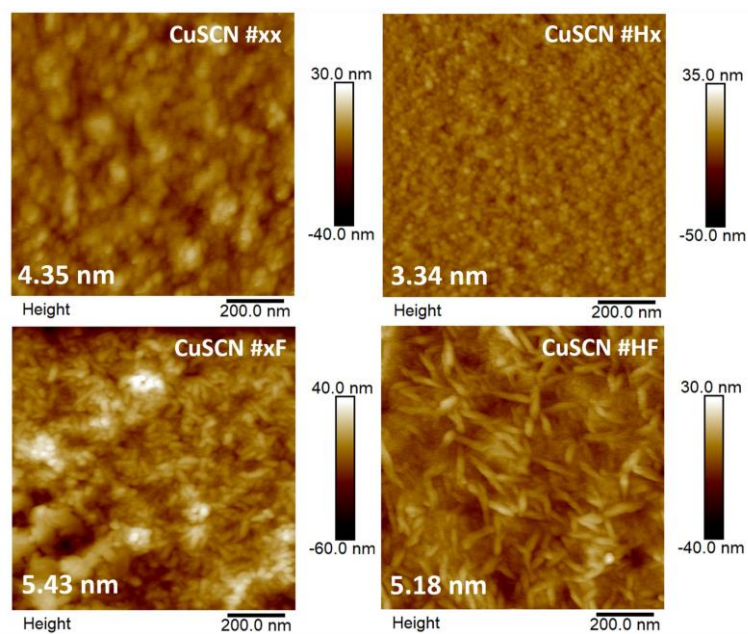

**Figure S2.** AFM topography of spin-coated CuSCN thin films on PEDOT:PSS/ITO substrates with their respective surface roughness.

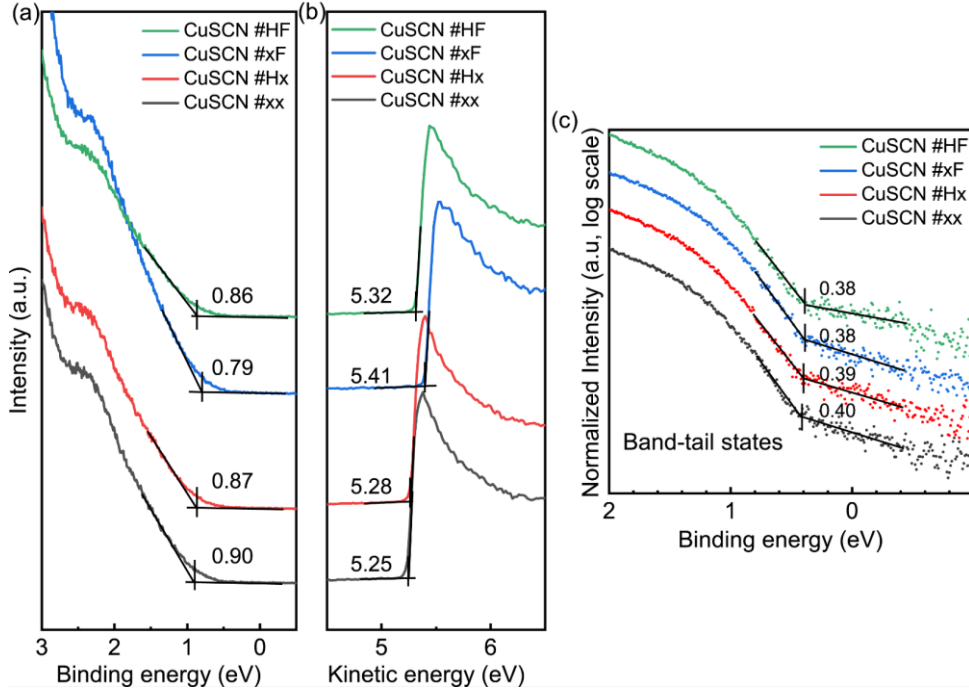

**Figure S3.** UPS-measured (a) valence band region, (b) secondary electron, and (c) valence band regions plotted on a semi-log scale of CuSCN thin films on PEDOT:PSS/ITO substrates.

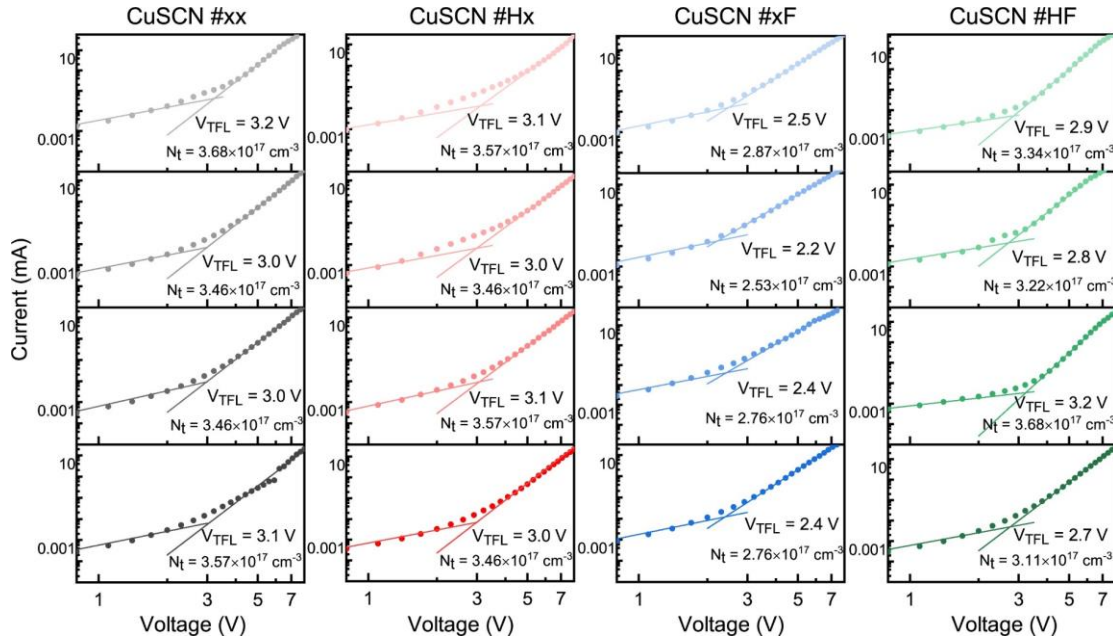

**Figure S4.** Characteristics of trap-filled-limit voltage and corresponding trap density by I-V curves of a single carrier device based on different CuSCN films.

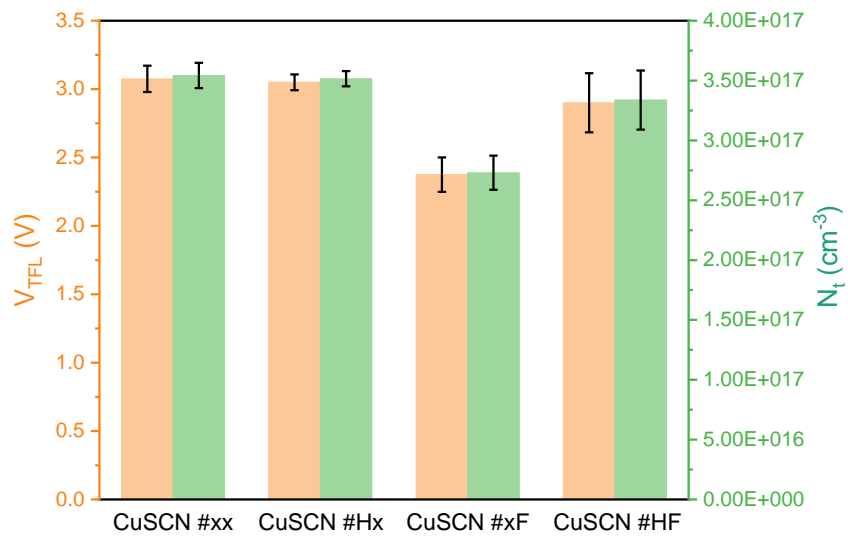

**Figure S5.** Trap-filled-limit voltage and corresponding trap density with standard deviation of different CuSCN-film-based hole-only devices.

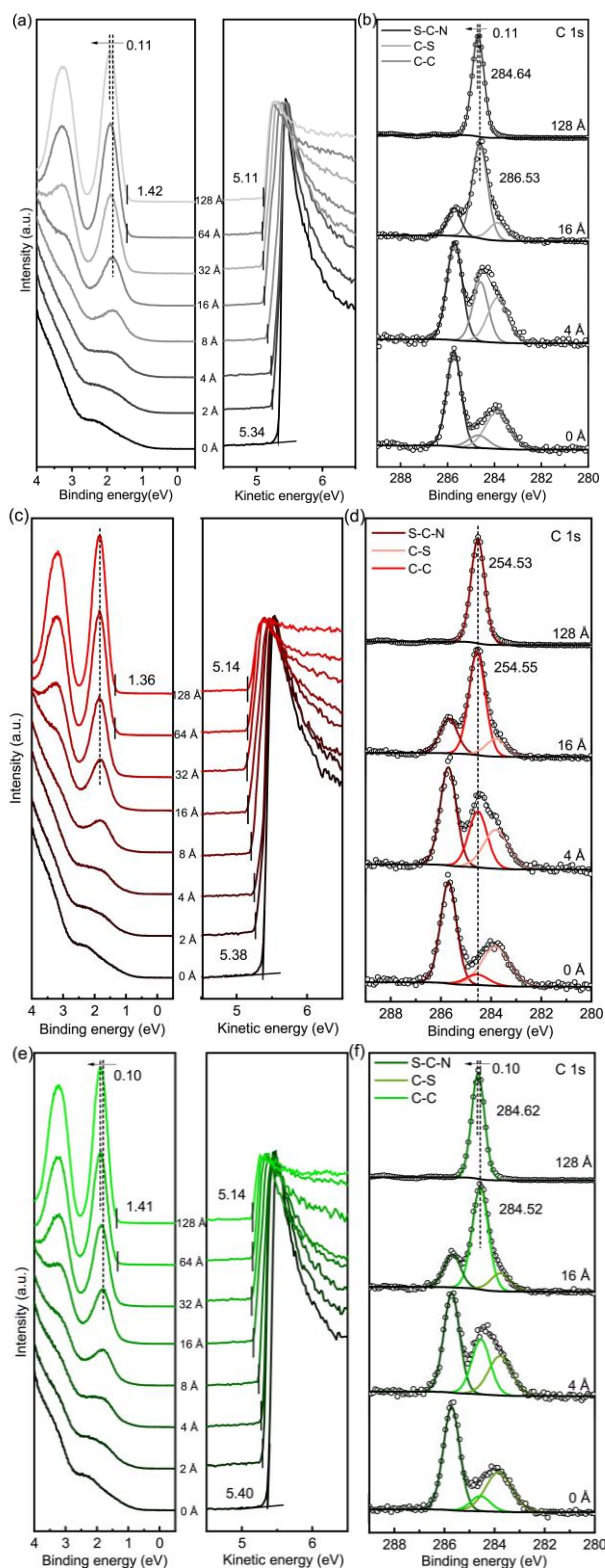

**Figure S6.** Thickness-dependent UPS spectra of (a)  $C_{60}/CuSCN \#xx$ , (c)  $C_{60}/CuSCN \#Hx$ , and (e)  $C_{60}/CuSCN \#HF$  and XPS measured C 1s core level spectra of (b)  $C_{60}/CuSCN \#xx$ , (d)  $C_{60}/CuSCN \#Hx$ , and (f)  $C_{60}/CuSCN \#HF$ , respectively. For  $C_{60}/CuSCN \#xx$  the HOMO level onset of 1.6 nm  $C_{60}$  is at 1.31 eV BE and shifts gradually toward higher BE by 0.11 eV from 1.6 nm to 12.8 nm thickness, this shift is parallel to the shift of the C 1s core-

level shift, indicating energy-level bending in the C<sub>60</sub> layer. For C<sub>60</sub> on CuSCN #HF the HOMO and C 1s level shift both by 0.10 eV.

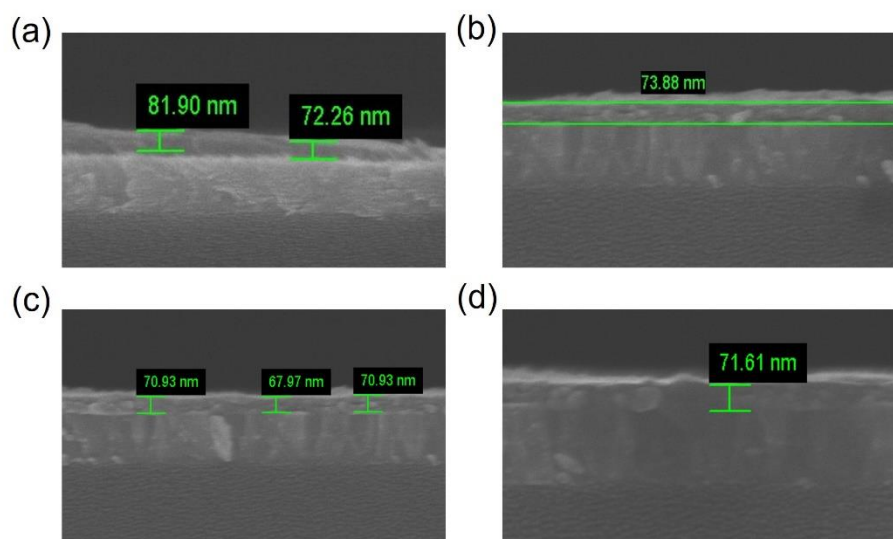

**Figure S7.** Cross-section scanning electron micrographs of CuSCN #xx (a), CuSCN #Hx (b), CuSCN #xF (c), CuSCN #HF (d).

**Table S1.** Properties of CuSCN films.

| Substrate                   | CuSCN | RMS<br>(nm) | VBM<br>(eV) | Trap state<br>density<br>(cm <sup>-3</sup> ) | CT state<br>intensity<br>(a.u.) |
|-----------------------------|-------|-------------|-------------|----------------------------------------------|---------------------------------|
| ITO<br>(RMS=3.78)           | #xx   | 6.81        | 0.83        |                                              |                                 |
|                             | #Hx   | 4.21        | 0.89        |                                              |                                 |
|                             | #xF   | 5.84        | 0.77        |                                              |                                 |
|                             | #HF   | 5.37        | 0.84        |                                              |                                 |
| PEDOT:PSS/ITO<br>(RMS=1.82) | #xx   | 4.35        | 0.90        | 3.54*10 <sup>17</sup>                        | 1.9                             |
|                             | #Hx   | 3.34        | 0.87        | 3.51*10 <sup>17</sup>                        | 0.9                             |
|                             | #xF   | 5.43        | 0.79        | 2.73*10 <sup>17</sup>                        | 10.6                            |
|                             | #HF   | 5.18        | 0.86        | 3.34*10 <sup>17</sup>                        | 2.1                             |
